# Supplementary material
Source: PubMed Central journal article supplement (PMC7498218)
Supplement: mmc1.pdf [file mmc1.pdf]

# THE LANCET

## Supplementary appendix

This appendix formed part of the original submission. We post it as supplied by the authors.

Supplement to: Pontes MRN, Pereira Lima J. Brazil's COVID-19 response. *Lancet* 2020; **396**: e34.

**Supporters:**

Prof Tulio M. Graziottin, MD, PhD  
Prof Florentino Mendes, MD, PhD  
Profa Julia Pereira Lima, MD, PhD  
Prof Sergio Zylberstein, MD, MSc  
Prof Newton Aerts, MD, PhD  
Profa Leticia Pires, MD, PhD  
Profa Tatiana Tourinho, MD, PhD  
Prof Nilon Erling Jr, MD, PhD  
Prof Renato A. K. Kalil, MD, PhD, FACC, FAHA  
Prof Nicolino Cesar Rosito, MD, Me, PhD  
Prof José Artur Sampaio, MD, PhD  
Profa Cristiane Kopacek, MD, PhD  
Prof Claudio Telöken, MD, PhD  
Prof Paulo R. O. Fontes, MD, PhD  
Profa Mirela Foresti Jimenez, MD, PhD  
Prof Fabio Luiz Waechter, MD, PhD  
Profa Arlete Hilbig, MD, PhD  
Profa Marlise de C. Ribeiro, MD, PhD  
Profa Leticia Viçosa, MD, PhD  
Profa Raquel Dibi, MD, PhD  
Profa Lenara Golbert, MD, PhD
